# Age-Related Clinical Spectrum of *Plasmodium knowlesi* Malaria and Predictors of Severity

Matthew J. Grigg,<sup>1,2</sup> Timothy William,<sup>2,3,4</sup> Bridget E. Barber,<sup>1,2</sup> Giri S. Rajahram,<sup>2,4,5</sup> Jayaram Menon,<sup>4,5</sup> Emma Schimann,<sup>1,2</sup> Kim Piera,<sup>1,2</sup> Christopher S. Wilkes,<sup>1,2</sup> Kaajal Patel,<sup>1,2</sup> Arjun Chandna,<sup>1,2</sup> Christopher J. Drakeley,<sup>6</sup> Tsin W. Yeo,<sup>1,2,7,8,a</sup> and Nicholas M. Anstey<sup>1,2,a</sup>

<sup>1</sup>Global and Tropical Health Division, Menzies School of Health Research and Charles Darwin University, Darwin, Northern Territory, Australia; <sup>2</sup>Infectious Diseases Society Sabah—Menzies School of Health Research Clinical Research Unit, <sup>3</sup>Jesselton Medical Centre, <sup>4</sup>Clinical Research Centre, Queen Elizabeth Hospital, and <sup>5</sup>Sabah Department of Health, Kota Kinabalu, Malaysia; <sup>6</sup>London School of Hygiene and Tropical Medicine, United Kingdom; and <sup>7</sup>Lee Kong Chian School of Medicine, Nanyang Technological University and <sup>8</sup>Communicable Disease Centre, Institute of Infectious Diseases and Epidemiology, Tan Tock Seng Hospital, Singapore

**Background.** *Plasmodium knowlesi* is increasingly reported in Southeast Asia, but prospective studies of its clinical spectrum in children and comparison with autochthonous human-only *Plasmodium* species are lacking.

**Methods.** Over 3.5 years, we prospectively assessed patients of any age with molecularly-confirmed *Plasmodium* mono-infection presenting to 3 district hospitals in Sabah, Malaysia.

**Results.** Of 481 *knowlesi*, 172 *vivax*, and 96 *falciparum* malaria cases enrolled, 44 (9%), 71 (41%), and 31 (32%) children aged ≤12 years. Median parasitemia was lower in *knowlesi* malaria (2480/μL [interquartile range, 538–8481/μL]) than in *falciparum* (9600/μL;  $P < .001$ ) and *vivax* malaria. In *P. knowlesi*, World Health Organization-defined anemia was present in 82% (95% confidence interval [CI], 67%–92%) of children vs 36% (95% CI, 31%–41%) of adults. Severe *knowlesi* malaria occurred in 6.4% (95% CI, 3.9%–8.3%) of adults but not in children; the commonest severity criterion was acute kidney injury. No patient had coma. Age, parasitemia, schizont proportion, abdominal pain, and dyspnea were independently associated with severe *knowlesi* malaria, with parasitemia >15 000/μL the best predictor (adjusted odds ratio, 16.1; negative predictive value, 98.5%;  $P < .001$ ). Two *knowlesi*-related adult deaths occurred (fatality rate: 4.2/1000 adults).

**Conclusions.** Age distribution and parasitemia differed markedly in *knowlesi* malaria compared to human-only species, with both uncomplicated and severe disease occurring at low parasitemia. Severe *knowlesi* malaria occurred only in adults; however, anemia was more common in children despite lower parasitemia. Parasitemia independently predicted *knowlesi* disease severity: Intravenous artesunate is warranted initially for those with parasitemia >15 000/μL.

**Keywords.** *Plasmodium knowlesi*; malaria; district; clinical epidemiology; children.

Since the initial description of a large focus of zoonotic *Plasmodium knowlesi* human cases in Sarawak, Malaysia, in 2004 [1], *knowlesi* malaria has been reported from countries across Southeast Asia [2, 3]. In Malaysia, *P. knowlesi* now accounts for >90% of all government-notified malaria cases [4–8], with >9500 reported cases from 2012 to 2016 [4, 5]. *Plasmodium knowlesi* is also increasingly reported in areas of western Indonesia [9, 10]. Difficulties with microscopic diagnosis [2, 11] have limited accurate reporting of the true incidence of *knowlesi* malaria, with the disease burden likely underestimated [2, 5–7, 12]. Despite great progress in reducing human-only malaria species in many countries [4, 5], increasing

numbers of *P. knowlesi* cases in Southeast Asia threaten regional malaria elimination. Conventional public health measures are unable to target zoonotic transmission to humans from the *P. knowlesi* reservoir in monkey hosts, particularly outdoors in agricultural or forest areas [13–16].

Prospective studies have described the clinical spectrum of naturally acquired adult *knowlesi* malaria [17, 18]. Severe *knowlesi* malaria has been reported in adults in Southeast Asia and in adult travelers returning from these regions [2, 12, 18, 19], with the risk of severe disease at least as high as from *Plasmodium falciparum* [18]. Deaths from *knowlesi* malaria have been more common in older adults and have been associated primarily with respiratory distress, hypotension, and acute kidney injury (AKI) [6, 12, 19–21].

Malaria notification data in *knowlesi*-endemic areas show a median age of 31 years, much higher than that seen with *P. falciparum* and *Plasmodium vivax* [7], although 6% (79/1325) of all notified *knowlesi* malaria cases in Sabah in 2014 occurred in children aged <15 years [6]. With the marked reduction in cases of *falciparum* and *vivax* malaria, *P. knowlesi* now accounts for around 49% of all reported pediatric malaria cases in Sabah [6]. Despite this, there are limited descriptions of *knowlesi* malaria

Received 23 November 2017; editorial decision 17 January 2018; accepted 25 January 2018; published online March 5, 2018.

<sup>a</sup>T. W. Y. and N. M. A. contributed equally to this work.

Correspondence: M. J. Grigg, Global and Tropical Health Division, Menzies School of Health Research, PO Box 41096, Casuarina, Darwin 0811, Northern Territory, Australia (matthew.grigg@menzies.edu.au).

Clinical Infectious Diseases® 2018;67(3):350–9

© The Author(s) 2018. Published by Oxford University Press for the Infectious Diseases Society of America. This is an Open Access article distributed under the terms of the Creative Commons Attribution License (<http://creativecommons.org/licenses/by/4.0/>), which permits unrestricted reuse, distribution, and reproduction in any medium, provided the original work is properly cited. DOI: 10.1093/cid/ciy065

in children [2, 22], or comparisons between zoonotic knowlesi malaria and locally acquired malaria from the human-only species *P. falciparum* and *P. vivax* in district settings.

In this study, we compared the predefined clinical spectrum between children and adults with malaria due to *P. knowlesi* or other *Plasmodium* species infection, and evaluated predictors of disease severity in a coendemic primary care setting.

## METHODS

### Study Sites and Referral System

This study was conducted in Kudat Division, northwest Sabah, Malaysia, covering an area of 4623 km<sup>2</sup> and with a total growth-rate adjusted Malaysian census-estimated population in 2016 of 199 600 people. Each of the 3 districts in this division has a central referral hospital and subdistrict health clinics, consistent with other districts in Sabah. Malaysian Ministry of Health guidelines stipulate that all patients with fever receive microscopic blood slide screening for malaria parasites, with mandatory hospital admission, free treatment, and notification of positive cases [23].

### Subjects

Patients of all ages presenting to study hospitals with microscopy-diagnosed malaria were enrolled following written informed consent. Children were predefined as age ≤12 years, consistent with Malaysian Ministry of Health pediatric ward admission. Patients were not included in the final analysis if they were pregnant or had *Plasmodium malariae* infection on polymerase chain reaction (PCR), if *Plasmodium* species PCR was not confirmed, or if cross-check research microscopy was negative. A subset of patients with uncomplicated *P. knowlesi* and *P. vivax* malaria was also enrolled in previously reported randomized controlled treatment trials [23–25].

### Study Procedures

Baseline and longitudinal clinical, laboratory, and epidemiological data were entered using standardized case record forms. Venous blood was taken for baseline investigations and then daily for microscopy and hematology during hospital admission and at the follow-up visit 28 days after treatment initiation. Severe malaria was defined using World Health Organization (WHO) 2014 research criteria [26], including for *P. knowlesi*: hyperparasitemia threshold of 100 000/μL, and jaundice defined as bilirubin >50 μmol/L with parasite count >20 000/μL and/or creatinine >132 μmol/L [18]. Nonsevere anemia was defined using WHO age- and sex-based hemoglobin criteria [27]. AKI was evaluated using Kidney Disease Outcomes Quality Working Group (KDIGO) criteria [28]. Chronic disease was defined as hypertension; diabetes mellitus; ischemic heart disease; hyperlipidemia; or chronic kidney, liver, or respiratory disease.

### Laboratory Procedures

Microscopic asexual parasite and gametocyte counts were calculated by research microscopists using thick blood smears and quantitated leukocyte count. Standard hospital automated hematology, biochemistry, and microbiology laboratory results were used. Final *Plasmodium* species confirmation was done using PCR [29, 30].

### Statistical Analysis

We compared between-group differences with analysis of variance or Kruskal-Wallis testing for continuous variables, and Student *t* test or the Wilcoxon–Mann-Whitney test for 2-group comparisons according to distribution. For categorical variables,  $\chi^2$  or Fisher's exact test was used. Logistic regression models were fitted to determine a priori predictors of severe malaria based on standard clinical and laboratory WHO 2014 research criteria [26] evaluable at time of acute patient presentation to district hospital settings, including testing for model interactions and collinearity. Receiver operating characteristic (ROC) analysis was used to assess their sensitivity and specificity. Multivariate analysis controlled for age and log<sub>10</sub> parasitemia; patients with hyperparasitemia as a sole severity criterion were considered nonsevere.

### Ethical Considerations

This study was approved by the medical research ethics committees of the Ministry of Health, Malaysia; London School of Hygiene and Tropical Medicine, United Kingdom; and Menzies School of Health Research, Australia.

## RESULTS

### Demographics

From October 2012 until April 2016, 811 malaria patients were enrolled (Figure 1). There were 481 *P. knowlesi*, 172 *P. vivax*, and 96 *P. falciparum* malaria cases included in the final analysis. From 2014 to 2015, the estimated minimum yearly malaria incidence in Kudat Division (district hospital presentations with clinical disease) for *P. knowlesi*, *P. vivax*, and *P. falciparum* was 0.79, 0.40, and 0.19 cases per 1000 people per year, respectively. Patients with knowlesi malaria had a median age of 33 years (interquartile range [IQR], 21–49 years), higher than those with vivax (15 years [IQR, 9–30 years]) and falciparum (16 years [IQR, 10–31 years]) malaria ( $P < .001$ ; Figure 2). Patients aged >50 years comprised 107 (22%) of knowlesi malaria cases, compared to 10 (6%) and 14 (15%) for falciparum and vivax malaria, respectively ( $P < .001$ ). A bimodal age distribution was seen for females with both *P. knowlesi* and *P. falciparum* infection. Of *P. knowlesi* cases, 44 (9%) were children, compared to 71 (41%) of *P. vivax* cases and 31 (32%) of those with *P. falciparum* malaria (Table 1;  $P < .001$ ). Only 6 (1.3%) knowlesi cases were <5 years of age, with only 1 infant (<1 year), a 6-week-old with no travel history or forest or plantation exposure. Compared to children

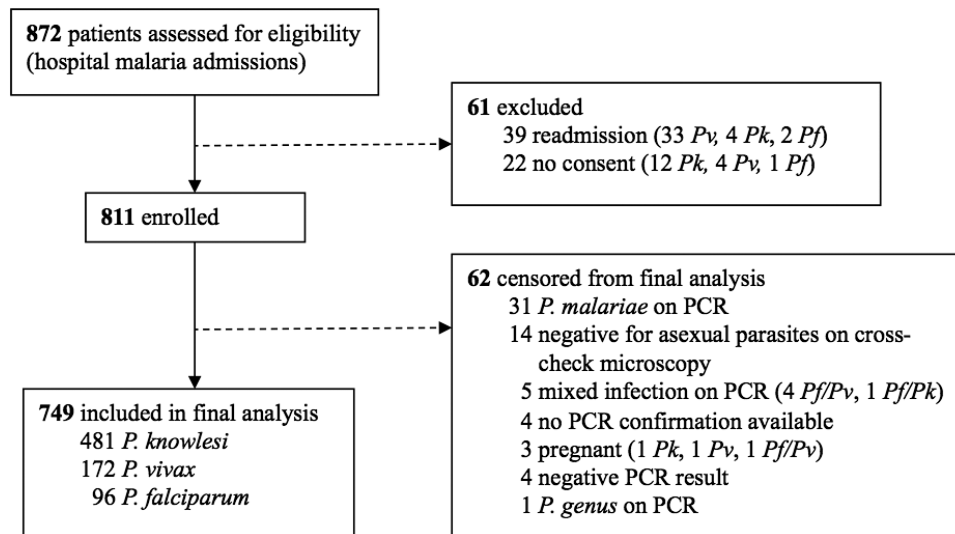

**Figure 1.** Enrollment flowchart. Abbreviations: PCR, polymerase chain reaction; *Pf*, *Plasmodium falciparum*; *Pk*, *Plasmodium knowlesi*; *Pv*, *Plasmodium vivax*.

with *P. knowlesi* malaria, adults were more likely to be male (79% vs 57%;  $P = .001$ ), with this relationship also evident for *P. vivax* cases (75% vs 48%;  $P < .001$ ).

#### Baseline Features: Children

Abdominal pain was more common in children with knowlesi compared to vivax malaria (43% vs 13%; odds ratio [OR], 5.2 [95% confidence interval {CI}, 2.1–13.1];  $P < .001$ ), although vomiting occurred more often in those with *P. vivax* ( $P = .033$ ) (Table 1). Children with knowlesi malaria had lower parasite counts than those with *P. vivax* (median, 1722 vs 5967 parasites/ $\mu\text{L}$ ;  $P < .001$ ) and *P. falciparum* (median, 1722 vs 7392 parasites/ $\mu\text{L}$ ;  $P < .001$ ). The highest parasite count recorded for a child with knowlesi malaria was 74365/ $\mu\text{L}$ , in an 11-year-old boy with uncomplicated disease. There were 36 (84%) children with knowlesi malaria with nonsevere anemia at presentation, comparable to children with other *Plasmodium* species infection, with no relationship to parasitemia demonstrated. The lowest hemoglobin

level of 5.1 g/dL was seen in a 4-year-old child with knowlesi malaria 2 days after treatment, with 2 other children having minimum hemoglobin levels of 7.0 g/dL, all of whom had a parasite count  $<1000/\mu\text{L}$  at presentation. Children with knowlesi malaria had lower neutrophil and lymphocyte counts on presentation compared to those with other *Plasmodium* species ( $P = .002$ ). Thirty (68%) children with knowlesi malaria had thrombocytopenia (platelet count  $<150 \times 10^3/\mu\text{L}$ ), including 4 (9%) with a platelet count  $<50 \times 10^3$  cells/ $\mu\text{L}$ . Frequency of thrombocytopenia in children with knowlesi malaria was comparable to those with *P. vivax* but more common than with *P. falciparum* malaria (OR, 3.0 [95% CI, 1.1–7.7];  $P = .026$ ). Children with knowlesi malaria were more likely to develop mild to moderate AKI compared to those with *P. vivax* (26% vs 10%; OR, 3.1 [95% CI, 1.1–8.7];  $P = .030$ ).

#### Baseline Features: Adults

Duration of fever for *P. knowlesi*-infected adults was comparable to both children with *P. knowlesi* and adults with malaria due to

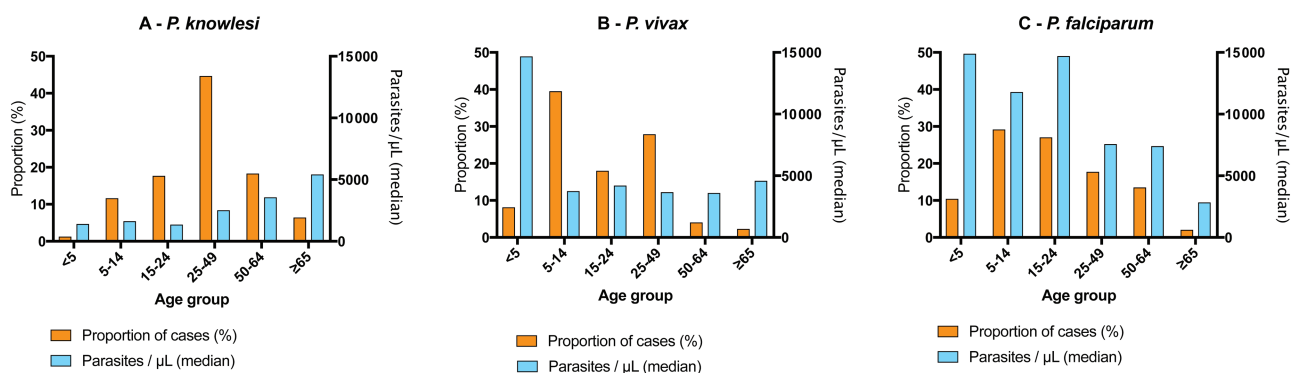

**Figure 2.** Proportion of cases and median parasite count by age-group and *Plasmodium* spp.

**Table 1. Baseline Demographic, Clinical, and Laboratory Features of Children**

| Patient Characteristic                                           | <i>Plasmodium knowlesi</i> | <i>Plasmodium vivax</i> | <i>Plasmodium falciparum</i> | P Value         |
|------------------------------------------------------------------|----------------------------|-------------------------|------------------------------|-----------------|
| Children (age ≤12 y), No. (% total)                              | 44 (9.1)                   | 71 (41.3)               | 31 (32.3)                    | <.001           |
| Age, y                                                           |                            |                         |                              |                 |
| Median (IQR)                                                     | 8 (5–10)                   | 9 (5–10)                | 7 (3–10)                     | .095            |
| Range                                                            | 0.1–12                     | 0.67–12                 | 1–12                         |                 |
| Male sex, No. (%)                                                | 25 (56.8)                  | 34 (47.9)               | 21 (67.7)                    | .170            |
| Previous malaria (self-reported), No. (%)                        | 4 (9.1)                    | 11 (15.5)               | 3 (9.7)                      | .526            |
| History of chronic disease, No. (%)                              | 2 (4.5)                    | 0                       | 0                            | .095            |
| Days of fever                                                    | 5 (3–7)                    | 5 (3–7)                 | 4 (3–5)                      | .751            |
| Symptoms on enrollment, No. (%)                                  |                            |                         |                              |                 |
| Rigors                                                           | 29 (65.9)                  | 55 (77.5)               | 14 (45.2)                    | <b>.006</b>     |
| Headache                                                         | 34 (77.3)                  | 55 (77.5)               | 21 (67.7)                    | .542            |
| Vomiting                                                         | 14 (31.8)                  | 37 (52.1)               | 11 (35.5)                    | .068            |
| Abdominal pain                                                   | 19 (43.2)                  | 9 (12.7)                | 9 (29.0)                     | <b>.001</b>     |
| Diarrhea                                                         | 4 (9.1)                    | 2 (2.8)                 | 4 (12.9)                     | .140            |
| Cough                                                            | 15 (34.1)                  | 25 (35.2)               | 12 (38.7)                    | .914            |
| Shortness of breath                                              | 3 (6.8)                    | 4 (5.6)                 | 4 (12.9)                     | .431            |
| Myalgia                                                          | 11 (25.0)                  | 15 (21.1)               | 7 (22.6)                     | .890            |
| Arthralgia                                                       | 12 (27.3)                  | 15 (21.1)               | 7 (22.6)                     | .746            |
| Examination findings on enrollment                               |                            |                         |                              |                 |
| Temperature, °C                                                  | 37.1 (36.8–37.9)           | 37.4 (36.8–37.8)        | 37.1 (36.8–38)               | .647            |
| Fever (≥37.5°C), No. (%)                                         | 17 (38.6)                  | 33 (46.5)               | 12 (38.7)                    | .634            |
| Systolic blood pressure, mm Hg                                   | 101 (94–109)               | 102 (96–110)            | 106 (98–112)                 | .356            |
| Heart rate, beats/min                                            | 104 (93–119)               | 105 (94–118)            | 117 (96–134)                 | .688            |
| Respiratory rate, breaths/min                                    | 24 (22–27)                 | 24 (22–28)              | 26 (24–28)                   | .081            |
| Oxygen saturation, %                                             | 99 (99–100)                | 99 (98–100)             | 100 (99–100)                 | .504            |
| Palpable liver, No. (%)                                          | 14 (31.8)                  | 20 (28.2)               | 8 (25.8)                     | .842            |
| Palpable spleen, No. (%)                                         | 9 (20.5)                   | 12 (16.9)               | 2 (6.5)                      | .244            |
| Rash, No. (%)                                                    | 1 (2.3)                    | 0 (0)                   | 1 (3.2)                      | .360            |
| Parasite count/μL                                                | 1722 (386–4830)            | 5967 (1829–13901)       | 7392 (1462–36546)            | <b>&lt;.001</b> |
| Parasite count/μL, range                                         | 36–74365                   | 109–140500              | 61–635415                    |                 |
| Schizont proportion, mean % (SD)                                 | 3 (7.5)                    | 1 (4.0)                 | 0 (0)                        | <b>.013</b>     |
| Schizont proportion >10%, No. (%)                                | 3 (6.8)                    | 1 (1.5)                 | 0 (0)                        | .138            |
| Parasite count >20000/μL, No. (%)                                | 4 (9)                      | 8 (11)                  | 12 (39)                      | <b>.001</b>     |
| Gametocytes present, no./No. (%)                                 | 4/35 (11)                  | 21/66 (32)              | 1/11 (9)                     | <b>.035</b>     |
| Hemoglobin, g/dL                                                 | 10.6 (9.7–11.3)            | 10.1 (9.3–11.2)         | 10.3 (9.2–11.6)              | .726            |
| Anemia <sup>a</sup> (baseline), No. (%)                          | 36 (82)                    | 56 (79)                 | 21 (68)                      | .328            |
| G6PD deficiency present, no./No. (%)                             | 1/38 (2.6)                 | 3/69 (4.3)              | 1/18 (5.6)                   | .852            |
| White blood cell count, × 10 <sup>3</sup> /μL                    | 6.1 (5.1–7.5)              | 7.1 (5.1–8.6)           | 9.2 (6.4–12.7)               | <b>.002</b>     |
| Neutrophil count, × 10 <sup>3</sup> /μL                          | 2.7 (2.0–3.5)              | 3.3 (2.5–4.8)           | 3.8 (2.5–6.8)                | <b>.015</b>     |
| Lymphocyte count, × 10 <sup>3</sup> /μL                          | 2.0 (1.4–2.7)              | 2.2 (1.6–2.9)           | 2.8 (1.7–5.0)                | <b>.025</b>     |
| Monocyte count, × 10 <sup>3</sup> /μL                            | 1.1 (0.8–1.4)              | 0.9 (0.6–1.3)           | 1.2 (0.7–1.4)                | .241            |
| Platelet count, × 10 <sup>3</sup> /μL                            | 106 (80–163)               | 120 (93–179)            | 159 (83–282)                 | .078            |
| Platelet nadir, × 10 <sup>3</sup> /μL                            | 78 (60–134)                | 104 (70–154)            | 129 (63–275)                 | <b>&lt;.001</b> |
| Platelet nadir, d                                                | 1 (0–1)                    | 1 (0–1)                 | 1 (0–1)                      | 1.000           |
| Thrombocytopenia (platelets <150 × 10 <sup>3</sup> /μL), No. (%) | 30 (68)                    | 46 (65)                 | 13 (42)                      | <b>.047</b>     |
| Creatinine, μmol/L                                               | 48 (36–57)                 | 48 (34–58)              | 40 (31–53)                   | .267            |
| Urea, mmol/L                                                     | 3.8 (2.8–4.5)              | 3.5 (3.0–4.6)           | 3.2 (2.3–4.5)                | .167            |
| Sodium, mmol/L                                                   | 137 (135–139)              | 137 (136–139)           | 136 (133–139)                | .640            |
| Bilirubin, μmol/L                                                | 11.5 (8.3–15.8)            | 9.8 (6.0–14.6)          | 11.0 (6.8–19.7)              | .474            |
| Glucose, mmol/L                                                  | 5.8 (5.1–6.8)              | 5.7 (5.0–6.4)           | 6.2 (5.6–6.6)                | .802            |
| Albumin, g/dL                                                    | 35 (31–37)                 | 34 (28–36)              | 32 (29–37)                   | .644            |
| AST, IU/L                                                        | 25 (23–34)                 | 24 (15–28)              | 37 (24–42)                   | .268            |
| ALT, IU/L                                                        | 16 (11–32)                 | 17 (11–28)              | 24 (14–32)                   | .270            |
| Bicarbonate, mmol/L                                              | 23 (21–25)                 | 22 (20–26)              | 25 (21–26)                   | .418            |
| Acute kidney injury, No. (%)                                     | 11 (26)                    | 7 (10)                  | 10 (32)                      | <b>.016</b>     |
| Blood culture positive <sup>b</sup> , No. (%)                    | 0/33 (0)                   | 0/28 (0)                | 0/15 (0)                     | 1.000           |

Data are presented as median (IQR) unless otherwise indicated. Results are from time of enrollment unless otherwise specified.

P values in bold font indicate a value <0.05.

Abbreviations: ALT, alanine aminotransferase; AST, aspartate aminotransferase; G6PD, glucose-6-phosphate dehydrogenase; IQR, interquartile range; SD, standard deviation.

<sup>a</sup>Anemia based on World Health Organization 2011 hemoglobin measurement criteria [27]: age 6–59 months (≤100 g/dL), 5–11 years (<115 g/dL), 12–14 years (<120 g/dL), nonpregnant women ≥15 years (<120 g/dL), pregnant women (<110 g/dL), men ≥15 years (<130 g/dL).

<sup>b</sup>Excluding results positive for skin contaminants.

other *Plasmodium* species (Table 2). Adult *P. knowlesi* cases were less likely to report abdominal pain compared to children with knowlesi malaria (23% vs 43%; OR, 0.40 [95% CI, .2–.8];  $P = .004$ ; Supplementary Table 1). Adults with knowlesi malaria had lower parasite counts (median, 2541/ $\mu\text{L}$ ) than those with vivax (median, 3765/ $\mu\text{L}$ ;  $P = .027$ ) or falciparum (median, 9924/ $\mu\text{L}$ ;  $P < .001$ ) malaria (Table 2). Age was positively correlated with parasitemia in *P. knowlesi* ( $r^2 = 0.15$ ;  $P = .002$ ), but not *P. falciparum* or *P. vivax* infection (Figure 2). Adult *P. knowlesi* cases had a lower risk of anemia at presentation compared to adults with vivax malaria (36% vs 50%, respectively; OR, 0.6 [95% CI, .4–.9];  $P = .013$ ), and children with knowlesi malaria (36% vs 82%; OR, 0.13 [95% CI, .06–.28];  $P < .001$ ). As with children, in adult knowlesi malaria parasitemia was not associated with anemia at enrollment after controlling for age. Adults with knowlesi malaria had lower platelet counts than those with other *Plasmodium* species ( $P < .001$ ), with thrombocytopenia more common in adults compared to children with knowlesi malaria (92% vs 68%, respectively;  $P < .001$ ). The risk of AKI was higher in adult *P. knowlesi* patients compared to *P. vivax* (19% vs 10%, respectively; OR, 2.1 [95% CI, 1.1–4.3];  $P = .033$ ), although this did not remain statistically significant after controlling for age; and was also comparable to that seen in both adults with *P. falciparum* and children with knowlesi malaria. Liver aminotransferases were higher in adults with knowlesi malaria compared to those with *P. vivax* including after controlling for age ( $P = .001$ ). Of the 322 adults with knowlesi malaria who had blood cultures, only 1 grew a noncontaminant isolate, a 14-year-old with *Neisseria meningitidis*.

### Severe Malaria

*Plasmodium knowlesi* was the most common cause of severe malaria, with 28 of 481 (5.8%) knowlesi cases having severe disease (Table 3), all of whom were adults (28/437; 6.4% [95% CI, 3.9%–8.3%]). Of the severe knowlesi cases, 19 (68%) had severe malaria on presentation and 9 (32%) developed severe complications following commencement of treatment. A single severity criterion defined severe malaria in 16 (57%), with 12 (43%) patients having  $\geq 2$  criteria (Table 4). The most common severity criterion was severe AKI (creatinine  $>265 \mu\text{mol/L}$ ), occurring in 10 (35.7%) severe knowlesi patients, including a single patient who progressed to severe AKI on day 1 of admission. Eight (29%) knowlesi patients had hyperparasitemia  $>100\,000/\mu\text{L}$ , including 5 (18%) as a sole severity criterion. Parasite counts were higher in severe knowlesi compared to nonsevere knowlesi malaria (median, 42 224 vs 2044 parasites/ $\mu\text{L}$ , respectively;  $P < .001$ ). The platelet count was lower in severe vs uncomplicated knowlesi malaria (median, 56 vs  $75 \times 10^3$  cells/ $\mu\text{L}$ , respectively;  $P = .004$ ), neutrophil count was higher (median,  $4.9$  vs  $3.7 \times 10^3$  cells/ $\mu\text{L}$ , respectively;  $P = .004$ ), and proportion of patients with hyponatremia was higher (48% vs 28%, respectively;  $P = .028$ ). Five (18%) knowlesi patients had

documented hypotension, all of whom had other severity criteria including 2 patients with respiratory distress. Empiric antibiotic treatment was given to 9 (32%) patients with severe knowlesi malaria. Of the 4 severe *P. vivax* cases, 2 were children with hyperbilirubinemia and a parasite count  $>20\,000/\mu\text{L}$ , both with moderate anemia (hemoglobin nadir of 6.8 g/dL and 9.1 g/dL, respectively). The other 2 patients with severe vivax malaria were adults, including a 17-year-old female with severe anemia, and a 53-year-old man with hypotension and respiratory distress. There were 5 patients with severe falciparum malaria (5.2%), including 2 children. No patient with malaria from any *Plasmodium* species had coma.

### Predictors of Severe Malaria

On multivariate logistic regression controlling for age and parasitemia, independent clinical and parasitological predictors of severe disease in knowlesi malaria included schizont proportion  $>10\%$ , abdominal pain, and dyspnea (Table 5). Among WHO laboratory severity criteria, creatinine, hemoglobin, bicarbonate, and bilirubin remained independent predictors of severe disease when patients with only a single WHO severity criterion based on these measures were reclassified as nonsevere. A parasite threshold of 15 000/ $\mu\text{L}$  had the best-combined sensitivity (74%) and specificity (87%) for predicting severe knowlesi malaria, with an area under the curve of 0.80 (95% CI, .71–.90) and a negative predictive value of 98.5%. Age  $\geq 45$  years was the best predictor of hyperparasitemia when controlling for other variables (adjusted OR, 4.9 [95% CI, 1.0–23.9];  $P = .048$ ). Adults with knowlesi malaria had a higher risk of severe disease compared to adult patients with vivax malaria (OR, 3.4 [95% CI, .8–14.5];  $P = .098$ ), and a comparable risk to falciparum malaria.

### Case Fatalities

There were 2 deaths attributed to malaria, both *P. knowlesi*, giving an overall *P. knowlesi* case fatality risk of 2 of 481 (0.4% [95% CI, 0.1%–1.5%]), or 2 of 437 (0.5% [95% CI, 0.1%–1.6%]) in adults. The *P. knowlesi*-related deaths were a 62-year-old woman with hyperparasitemia (263 772/ $\mu\text{L}$ ) and moderate AKI (creatinine: 224  $\mu\text{mol/L}$ ), who developed hypotension and acute respiratory distress [6], and a 50-year-old man presenting with severe AKI (creatinine: 609  $\mu\text{mol/L}$ ), parasitemia of 71 939/ $\mu\text{L}$ , and moderate anemia (hemoglobin: 9.9 g/dL).

## DISCUSSION

This study is the largest series of *P. knowlesi* malaria cases to date, and the first to prospectively compare the clinical spectrum of disease between adults and children. Although 91% of knowlesi malaria cases were adults, morbidity in children was also demonstrated, with an 11-fold higher risk of anemia at presentation and a similar risk of mild to moderate AKI compared to adults [1, 7]. The majority of adults with

**Table 2. Baseline Demographic, Clinical, and Laboratory Features in Adults**

| Patient Characteristic                                           | <i>Plasmodium knowlesi</i> | <i>Plasmodium vivax</i> | <i>Plasmodium falciparum</i> | PValue                  |
|------------------------------------------------------------------|----------------------------|-------------------------|------------------------------|-------------------------|
| Adults (age >12 y), No. (% total)                                | 437 (90.9)                 | 101 (58.7)              | 65 (67.7)                    | <b>&lt;.001</b>         |
| Age, y                                                           |                            |                         |                              |                         |
| Median (IQR)                                                     | 35 (25–50)                 | 27 (17–35)              | 24 (16–47)                   | <b>&lt;.001</b>         |
| Range                                                            | 13–85                      | 13–70                   | 1–12                         |                         |
| Male sex, No. (%)                                                | 345 (78.9)                 | 76 (75.2)               | 48 (73.8)                    | .522                    |
| Previous malaria (self-reported), No. (%)                        | 93 (21.3)                  | 26 (25.7)               | 8 (12.7)                     | .137                    |
| History of chronic disease, No. (%)                              | 35 (8.0)                   | 2 (2.0)                 | 3 (4.6)                      | .066                    |
| Days of fever                                                    | 4 (3–7)                    | 5 (3–7)                 | 4 (3–6)                      | .089                    |
| Symptoms on enrollment, No. (%)                                  |                            |                         |                              |                         |
| Rigors                                                           | 359 (82.3)                 | 86 (85.1)               | 49 (76.6)                    | .369                    |
| Headache                                                         | 389 (89.0)                 | 93 (92.1)               | 56 (86.2)                    | .469                    |
| Vomiting                                                         | 105 (24.0)                 | 43 (42.6)               | 28 (43.1)                    | <b>&lt;.001</b>         |
| Abdominal pain                                                   | 102 (23.3)                 | 25 (24.8)               | 18 (27.7)                    | .734                    |
| Diarrhea                                                         | 36 (8.2)                   | 10 (9.9)                | 7 (10.8)                     | .726                    |
| Cough                                                            | 153 (35.0)                 | 32 (31.7)               | 22 (33.8)                    | .814                    |
| Shortness of breath                                              | 70 (16.0)                  | 20 (19.8)               | 10 (15.4)                    | .630                    |
| Myalgia                                                          | 269 (61.6)                 | 58 (57.4)               | 35 (53.8)                    | .418                    |
| Arthralgia                                                       | 289 (66.1)                 | 59 (58.4)               | 34 (52.3)                    | .052                    |
| Examination findings on enrollment                               |                            |                         |                              |                         |
| Temperature, °C                                                  | 37.4 (37.0–38.1)           | 37.4 (36.9–38.0)        | 37.0 (36.8–38)               | .001                    |
| Fever (≥37.5°C), No. (%)                                         | 215 (49.3)                 | 47 (46.5)               | 23 (35.4)                    | .634                    |
| Systolic blood pressure, mm Hg                                   | 120 (110–130)              | 115 (106–125)           | 112 (106–125)                | <b>.004<sup>a</sup></b> |
| Heart rate, beats/min                                            | 88 (77–100)                | 92 (78–102)             | 92 (81–100)                  | <b>.025<sup>a</sup></b> |
| Respiratory rate, breaths/min                                    | 20 (20–24)                 | 20 (20–22)              | 21 (20–22)                   | .260                    |
| Oxygen saturation, %                                             | 98 (97–99)                 | 99 (98–100)             | 99 (98–100)                  | <b>&lt;.001</b>         |
| Palpable liver, No. (%)                                          | 105 (24.0)                 | 21 (20.8)               | 11 (16.9)                    | .390                    |
| Palpable spleen, No. (%)                                         | 26 (5.9)                   | 9 (8.9)                 | 6 (9.2)                      | .404                    |
| Rash, No. (%)                                                    | 19 (4.3)                   | 3 (3.0)                 | 1 (1.6)                      | .492                    |
| Parasite count/μL                                                | 2541 (478–8585)            | 3765 (1755–8122)        | 9924 (2522–22860)            | <b>&lt;.001</b>         |
| Parasite count/μL, range                                         | 20–263 772                 | 53–184 353              | 33–693 922                   |                         |
| Schizont proportion, mean % (SD)                                 | 2 (5.4)                    | 1 (2.1)                 | 0 (0.1)                      | <b>&lt;.001</b>         |
| Schizont proportion >10%, No. (%)                                | 32/432 (7.4)               | 2/99 (2.0)              | 0 (0)                        | <b>.014</b>             |
| Parasite count >20000/μL, No. (%)                                | 64 (15)                    | 7 (7)                   | 21 (32)                      | <b>&lt;.001</b>         |
| Gametocytes present, no./No. (%)                                 | 54/379 (14)                | 48/92 (52)              | 7/31 (23)                    | <b>&lt;.001</b>         |
| Hemoglobin, g/dL                                                 | 13.2 (12.1–14.3)           | 12.8 (11.2–14.2)        | 13.1 (11.3–14.4)             | .058                    |
| Anemia* (baseline), No. (%)                                      | 156 (36)                   | 50 (50)                 | 26 (41)                      | <b>.041</b>             |
| G6PD deficiency present, no./No. (%)                             | 4/364 (1.1)                | 4/94 (4.3)              | 1/48 (2.1)                   | .117                    |
| White blood cell count, × 10 <sup>3</sup> /μL                    | 6.1 (5.1–7.6)              | 6.5 (5.3–7.8)           | 6.5 (5.1–8.0)                | <b>.013</b>             |
| Neutrophil count, × 10 <sup>3</sup> /μL                          | 3.5 (2.6–4.5)              | 4.0 (3.0–5.1)           | 4.2 (3.1–5.4)                | <b>&lt;.001</b>         |
| Lymphocyte count, × 10 <sup>3</sup> /μL                          | 1.4 (1.0–1.9)              | 1.4 (1.1–2.0)           | 1.4 (1.0–2.3)                | .675                    |
| Monocyte count, × 10 <sup>3</sup> /μL                            | 1.0 (0.7–1.4)              | 0.7 (0.5–1.0)           | 0.7 (0.5–1.0)                | <b>&lt;.001</b>         |
| Platelet count, × 10 <sup>3</sup> /μL                            | 70 (50–103)                | 95 (66–134)             | 91 (54–149)                  | <b>&lt;.001</b>         |
| Platelet nadir, × 10 <sup>3</sup> /μL                            | 60 (42–83)                 | 85 (56–115)             | 81 (44–135)                  | <b>&lt;.001</b>         |
| Platelet nadir, d                                                | 1 (1-1)                    | 1 (1-1)                 | 1 (1-1)                      | 1.000                   |
| Thrombocytopenia (platelets <150 × 10 <sup>3</sup> /μL), No. (%) | 401 (92)                   | 82 (81)                 | 49 (75)                      | <b>&lt;.001</b>         |
| Creatinine, μmol/L                                               | 88 (75–103)                | 78 (61–93)              | 75 (58–91)                   | <b>&lt;.001</b>         |
| Urea, mmol/L                                                     | 5.2 (3.8–6.8)              | 4.7 (3.5–5.8)           | 5.0 (3.5–7.2)                | <b>.032</b>             |
| Sodium, mmol/L                                                   | 136 (134–139)              | 137 (135–139)           | 136 (134–139)                | .819                    |
| Bilirubin, μmol/L                                                | 17.1 (11.8–24.6)           | 14.0 (7.6–23.0)         | 18.3 (10.2–30.0)             | <b>.032</b>             |
| Glucose, mmol/L                                                  | 6.4 (5.6–7.4)              | 6.3 (5.7–6.7)           | 6.3 (5.3–7.5)                | .272                    |
| Albumin, g/dL                                                    | 36 (30–40)                 | 34 (30–38)              | 32 (29–37)                   | <b>.011</b>             |
| AST, IU/L                                                        | 34 (23–47)                 | 10 (6–15)               | 28 (16–37)                   | <b>&lt;.001</b>         |
| ALT, IU/L                                                        | 37 (24–56)                 | 23 (14–36)              | 36 (22–48)                   | <b>&lt;.001</b>         |
| Bicarbonate, mmol/L                                              | 24 (21–27)                 | 23 (21–25)              | 22 (20–24)                   | .921                    |
| Acute kidney injury, No. (%)                                     | 83 (19)                    | 10 (10)                 | 17 (27)                      | <b>.018</b>             |
| Blood culture positive <sup>b</sup> , No. (%)                    | 1/322 (<1)                 | 0/64 (0)                | 0/31 (0)                     | 1.000                   |

Data are presented as median (IQR) unless otherwise indicated. Includes 2 *P. knowlesi* and 1 *P. falciparum* uncomplicated malaria adult patients given single-dose treatment by public health workers prior to enrollment.

P values in bold font indicate a value <.05.

Abbreviations: ALT, alanine aminotransferase; AST, aspartate aminotransferase; G6PD, glucose-6-phosphate dehydrogenase; IQR, interquartile range; SD, standard deviation.

\*Anemia based on World Health Organization 2011 hemoglobin measurement criteria [18]: age 6–59 months (≤100 g/dL), 5–11 years (<115 g/dL), 12–14 years (<120 g/dL), nonpregnant women ≥15 years (<120 g/dL), pregnant women (<110 g/dL), men ≥15 years (<130 g/dL).

<sup>a</sup>Comparisons did not remain statistically significant after controlling for age.

<sup>b</sup>Excluding results positive for skin contaminants; 1 patient with *Neisseria meningitidis*.

**Table 3. Severe Malaria**

| Characteristic         | <i>Plasmodium knowlesi</i><br>(N = 481) | <i>Plasmodium vivax</i><br>(N = 172) | <i>Plasmodium falciparum</i><br>(N = 96) | P Value         |
|------------------------|-----------------------------------------|--------------------------------------|------------------------------------------|-----------------|
| <b>Severe cases</b>    |                                         |                                      |                                          |                 |
| No.                    | 28                                      | 4                                    | 5                                        |                 |
| %                      | 5.8                                     | 2.3                                  | 5.2                                      | .225            |
| 95% CI                 | 3.9–8.3                                 | 0.6–5.8                              | 1.7–11.7                                 |                 |
| <b>Age, y</b>          |                                         |                                      |                                          |                 |
| Median                 | 53                                      | 11                                   | 14                                       | <b>&lt;.001</b> |
| IQR                    | 43–64                                   | 4–35                                 | 2–16                                     |                 |
| Range                  | 13–78                                   | 3–53                                 | 1–26                                     |                 |
| <b>Child age ≤12 y</b> |                                         |                                      |                                          |                 |
| No.                    | 0                                       | 2                                    | 2                                        | <b>.001</b>     |
| %                      | 0                                       | 2.8                                  | 6.5                                      |                 |
| <b>Male sex</b>        |                                         |                                      |                                          |                 |
| No.                    | 19                                      | 2                                    | 4                                        | .709            |
| % severe               | 68                                      | 50                                   | 80                                       |                 |
| <b>Parasitemia/μL</b>  |                                         |                                      |                                          |                 |
| Median                 | 42 225                                  | 19 333                               | 297 000                                  | <b>.031</b>     |
| IQR                    | 17 221–103 577                          | 6076–43 680                          | 85 505–635 415                           |                 |

P values in bold font indicate a value <0.05.

Abbreviations: CI, confidence interval; IQR, interquartile range.

knowlesi malaria had uncomplicated disease and, compared to those with vivax and falciparum malaria, were older, with a lower risk of nonsevere anemia and a higher risk of thrombocytopenia, consistent with previous reports [1, 17, 18]. The lower parasitemia in both children and adults with clinical illness from *P. knowlesi* infection compared with the human-only *Plasmodium* species may indicate a lower pyrogenic threshold and greater inflammatory response, consistent with

poor adaptation of this zoonotic parasite to the human host. Although *P. knowlesi* has a 24-hour blood-stage life cycle in humans, the low parasitemia in most infections may indicate variable efficiency in human red blood cell (RBC) invasion [31]. Only a minority had high parasitemia, with parasitemia an independent predictor of severe knowlesi malaria overall. Notably, there was no coma or convulsions seen in any patient with knowlesi malaria, consistent with previous studies

**Table 4. Severe *Plasmodium knowlesi* Malaria Characteristics**

| WHO Severity Criteria                        | Definition                                                                                              | No. | % Severe<br>(n = 28) | % Total<br>(n = 481) |
|----------------------------------------------|---------------------------------------------------------------------------------------------------------|-----|----------------------|----------------------|
| Hyperparasitemia                             | Parasite count >100 000/μL                                                                              | 8   | 28.6                 | 1.7                  |
| Hypotension                                  | Systolic blood pressure <70 mm Hg in children or <80 mm Hg in adults                                    | 5   | 17.9                 | 1.0                  |
| Impaired consciousness                       | Glasgow coma score <11 in adults or Blantyre coma score <3 in children                                  | 0   | 0                    | 0                    |
| Metabolic acidosis                           | Plasma bicarbonate <15 mmol/L                                                                           | 3   | 10.7                 | 0.6                  |
| Respiratory distress                         | Oxygen saturation <92% on room air with a respiratory rate >30/min                                      | 2   | 7.1                  | 0.4                  |
| Jaundice                                     | Total bilirubin >50 μmol/L; with parasite count >20 000/μL and/or creatinine level >132 μmol/L          | 8   | 28.6                 | 2.0                  |
| Severe acute kidney injury                   | Plasma or serum creatinine >265 μmol/L                                                                  | 10  | 35.7                 | 2.1                  |
| Severe malarial anemia <sup>a</sup>          | Hemoglobin concentration <5 g/dL in children, and <7 g/dL in adults                                     | 8   | 28.6                 | 1.7                  |
| Hypoglycemia                                 | Blood or plasma glucose <2.2 mmol/L                                                                     | 1   | 3.6                  | 0.2                  |
| Significant bleeding                         | Including recurrent or prolonged bleeding from nose, gums, or venipuncture sites; hematemesis or melena | 1   | 3.6                  | 0.2                  |
| ≥2 criteria                                  |                                                                                                         | 12  | 42.9                 | 2.5                  |
| Severe criteria developed after presentation |                                                                                                         | 8   | 28.6                 | 1.7                  |
| Transfer to tertiary hospital                |                                                                                                         | 15  | 53.6                 | 3.1                  |
| Admitted to ICU                              |                                                                                                         | 10  | 35.7                 | 2.1                  |
| Death                                        |                                                                                                         | 2   | 7.1                  | 0.4                  |

P values in bold font indicate a value <0.05.

Abbreviations: ICU, intensive care unit; WHO, World Health Organization.

<sup>a</sup>Includes 2 *Plasmodium knowlesi* patients with serious underlying medical illness: 1 with worsening of known chronic kidney disease (acute kidney injury) and another with endometriosis-associated bleeding (anemia).

**Table 5. Selected Clinical and Laboratory Predictors of Severe Knowlesi Malaria at Presentation**

| Variable                                    | UM<br>(n = 453) |    | SM<br>(n = 28) |              | Univariate Analysis <sup>a</sup> |          |         |          |          | ROC Analysis |           |      |            |                         | Multivariate Analysis <sup>b</sup> |         |
|---------------------------------------------|-----------------|----|----------------|--------------|----------------------------------|----------|---------|----------|----------|--------------|-----------|------|------------|-------------------------|------------------------------------|---------|
|                                             | %               |    | %              |              | OR                               | (95% CI) | P Value | Sens (%) | Spec (%) | PPV (%)      | NPV (%)   | AUC  | (95% CI)   | aOR                     | (95% CI)                           | P Value |
|                                             |                 |    |                |              |                                  |          |         |          |          |              |           |      |            |                         |                                    |         |
| Age >40 y                                   | 37              | 79 | 6.3            | (2.5–16.0)   | <.001                            | 79       | 63      | 11.7     | 98.0     | 0.71         | (.63–.79) | 5.7  | (1.8–17.6) | <b>.003</b>             |                                    |         |
| Age >45 y                                   | 28              | 71 | 6.5            | (2.8–15.1)   | <.001                            | 71       | 72      | 13.7     | 97.6     | 0.72         | (.63–.81) | 7.3  | (2.6–21.0) | <b>&lt;.001</b>         |                                    |         |
| Age >50 y                                   | 20              | 57 | 5.3            | (2.4–11.6)   | <.001                            | 57       | 80      | 15.0     | 96.8     | 0.69         | (.59–.78) | 4.5  | (1.8–11.4) | <b>.001</b>             |                                    |         |
| Male sex                                    | 23              | 68 | 1.6            | (.7–3.7)     | .245                             | 32       | 78      | 8.1      | 94.9     | 0.55         | (.46–.64) | 1.7  | (.6–5.0)   | .312                    |                                    |         |
| Previous malaria episode                    | 19              | 36 | 2.3            | (1.0–5.2)    | .039                             | 36       | 81      | 10.3     | 95.3     | 0.57         | (.47–.66) | 2.4  | (.9–6.6)   | .530                    |                                    |         |
| Chronic disease                             | 6               | 29 | 5.9            | (2.4–14.4)   | <.001                            | 29       | 94      | 21.6     | 95.5     | 0.61         | (.52–.70) | 2.3  | (.7–7.4)   | .170                    |                                    |         |
| Abdominal pain                              | 24              | 46 | 2.8            | (1.3–6.0)    | .010                             | 46       | 76      | 10.7     | 95.8     | 0.61         | (.52–.71) | 3.5  | (1.3–9.2)  | <b>.013</b>             |                                    |         |
| Shortness of breath                         | 14              | 39 | 4.1            | (1.8–9.1)    | .001                             | 39       | 86      | 15.1     | 95.8     | 0.63         | (.54–.72) | 4.1  | (1.5–11.0) | <b>.005</b>             |                                    |         |
| Parasite count >10 000/μL                   | 17              | 79 | 12.6           | (4.8–33.0)   | <.001                            | 74       | 82      | 21.8     | 98.4     | 0.78         | (.68–.87) | 10.0 | (3.7–26.8) | <b>&lt;.001</b>         |                                    |         |
| Parasite count >15 000/μL                   | 12              | 79 | 18.8           | (7.1–49.6)   | <.001                            | 74       | 87      | 28.6     | 98.5     | 0.80         | (.71–.90) | 16.1 | (5.9–44.0) | <b>&lt;.001</b>         |                                    |         |
| Parasite count >20 000/μL                   | 11              | 64 | 11.6           | (4.8–28.2)   | <.001                            | 61       | 88      | 26.5     | 97.6     | 0.75         | (.64–.85) | 8.9  | (3.5–27.6) | <b>&lt;.001</b>         |                                    |         |
| Parasite count >35 000/μL                   | 5               | 57 | 18.1           | (7.3–45.0)   | <.001                            | 52       | 94      | 42.1     | 97.3     | 0.73         | (.63–.84) | 12.8 | (4.9–33.6) | <b>&lt;.001</b>         |                                    |         |
| Schizont proportion >1%                     | 31              | 57 | 2.9            | (1.4–6.4)    | .006                             | 57       | 69      | 57.1     | 68.8     | 0.63         | (.53–.73) | 1.4  | (.5–3.6)   | .510                    |                                    |         |
| Schizont proportion >10%                    | 8               | 18 | 2.7            | (1.0–7.5)    | .060                             | 18       | 92      | 17.9     | 92.5     | 0.55         | (.48–.63) | 5.3  | (1.5–19.4) | <b>.011</b>             |                                    |         |
| Platelets <30 × 10 <sup>3</sup> /μL         | 6               | 18 | 3.7            | (1.3–10.5)   | .014                             | 18       | 94      | 17.9     | 94.4     | 0.56         | (.49–.63) | 1.4  | (.4–5.0)   | .623                    |                                    |         |
| Platelets <50 × 10 <sup>3</sup> /μL         | 22              | 43 | 2.6            | (1.2–5.7)    | .015                             | 43       | 78      | 10.7     | 95.6     | 0.60         | (.51–.70) | 1.2  | (.5–3.1)   | .703                    |                                    |         |
| Bilirubin >25 μmol/L                        | 21              | 50 | 3.3            | (1.2–8.7)    | .018                             | 47       | 79      | 9.1      | 97.0     | 0.63         | (.50–.75) | 1.9  | (.6–5.6)   | .244                    |                                    |         |
| Bilirubin >30 μmol/L                        | 14              | 46 | 4.1            | (1.5–11.3)   | .006                             | 41       | 86      | 11.3     | 97.0     | 0.63         | (.51–.76) | 2.3  | (.7–7.0)   | .147                    |                                    |         |
| Bilirubin >50 μmol/L                        | 3               | 33 | 10.9           | (3.4–35.2)   | <.001                            | 29       | 96      | 26.3     | 96.8     | 0.63         | (.52–.74) | 5.1  | (1.4–19.4) | <b>.016<sup>c</sup></b> |                                    |         |
| Creatinine >100 μmol/L                      | 24              | 61 | 4.3            | (1.9–9.6)    | <.001                            | 58       | 76      | 12.3     | 69.8     | 0.67         | (.57–.77) | 3.1  | (1.1–8.6)  | <b>.028<sup>c</sup></b> |                                    |         |
| Creatinine >132 μmol/L                      | 5               | 28 | 14.9           | (6.2–35.7)   | <.001                            | 46       | 95      | 33.3     | 96.8     | 0.70         | (.61–.80) | 6.6  | (2.3–19.2) | <b>.001<sup>c</sup></b> |                                    |         |
| Creatinine >150 μmol/L                      | 3               | 43 | 17.8           | (6.9–45.6)   | <.001                            | 38       | 97      | 40.0     | 96.4     | 0.68         | (.58–.77) | 6.9  | (2.1–22.1) | <b>.001<sup>c</sup></b> |                                    |         |
| Hemoglobin <9 g/dL                          | 2               | 29 | 7.4            | (2.2–24.9)   | .001                             | 17       | 97      | 25.0     | 95.7     | 0.57         | (.49–.65) | 13.5 | (2.4–75.6) | <b>.003<sup>c</sup></b> |                                    |         |
| Hemoglobin <10 g/dL                         | 6               | 36 | 4.6            | (1.7–12.3)   | .003                             | 25       | 93      | 16.2     | 95.9     | 0.59         | (.50–.68) | 8.1  | (2.2–29.8) | <b>.002<sup>c</sup></b> |                                    |         |
| Anemia (WHO age criteria)                   | 34              | 64 | 4.1            | (1.5–11.0)   | .005                             | 68       | 65      | 7.6      | 98.0     | 0.67         | (.56–.78) | 4.1  | (1.4–12.5) | <b>.012<sup>c</sup></b> |                                    |         |
| Neutrophil count >4.0 × 10 <sup>3</sup> /μL | 34              | 60 | 2.9            | (1.3–6.5)    | .013                             | 60       | 66      | 9.0      | 96.6     | 0.63         | (.53–.73) | 1.3  | (.5–3.4)   | .661                    |                                    |         |
| Bicarbonate <20 mmol/L                      | 15              | 38 | 3.4            | (1.4–8.6)    | .009                             | 38       | 85      | 12.7     | 95.9     | 0.61         | (.51–.72) | 2.4  | (.8–7.3)   | .128                    |                                    |         |
| Bicarbonate <18 mmol/L                      | 1               | 24 | 22.2           | (5.8–84.5)   | <.001                            | 24       | 99      | 50.0     | 95.7     | 0.61         | (.52–.71) | 19.6 | (2.9–132)  | <b>.002<sup>c</sup></b> |                                    |         |
| Age ≥45 and parasite count >15 000/μL       | 5               | 68 | 43.3           | (16.4–114.6) | <.001                            | 65       | 96      | 44.1     | 98.2     | 0.81         | (.71–.91) | ...  | ...        | ...                     |                                    |         |
| Age ≥45 or parasite count >15 000/μL        | 46              | 89 | 10.6           | (3.1–36.1)   | <.001                            | 87       | 61      | 10.2     | 98.9     | 0.74         | (.67–.82) | ...  | ...        | ...                     |                                    |         |
| Age ≥50 or parasite count >20 000/μL        | 3               | 50 | 8.4            | (3.1–21.2)   | <.001                            | 78       | 70      | 11.6     | 98.5     | 0.74         | (.65–.83) | ...  | ...        | ...                     |                                    |         |
| Age ≥45 or chronic disease                  | 31              | 79 | 8.0            | (3.2–20.2)   | <.001                            | 79       | 69      | 13.4     | 98.1     | 0.74         | (.66–.82) | 6.6  | (2.4–17.8) | <b>&lt;.001</b>         |                                    |         |

All odds ratios are presented using the complement within the defined variable, for example, age >40 years compared with ≤40 years.

P values in bold font indicate a value <0.05.

Abbreviations: aOR, adjusted odds ratio; AUC, area under the curve; CI, confidence interval; NPV, negative predictive value; OR, odds ratio; PPV, positive predictive value; ROC, receiver operating characteristic; Sens, sensitivity; SM, severe malaria; Spec, specificity; UM, uncomplicated malaria; WHO, World Health Organization.

<sup>a</sup>Univariate analysis: patients with only a single severity criterion (hyperparasitemia, acute kidney injury, anemia, respiratory distress, acidosis, or jaundice) were considered nonsevere for the relevant analysis of the corresponding clinical or investigation result.

<sup>b</sup>Multivariate analysis controlled for: age and (hyper)parasitemia. Patients with hyperparasitemia as a single severity criterion were considered nonsevere.

<sup>c</sup>Creatinine, hemoglobin, bicarbonate, and bilirubin at the thresholds shown remained independent predictors of severe disease when patients with only a single WHO severity criterion based on these markers were reclassified as nonsevere.



[6, 17, 18, 32]. No child with knowlesi malaria had severe manifestations (although borderline severe anemia was present in one), in contrast to the severe disease found in pediatric falciparum and vivax malaria in this series and elsewhere [26].

A lower proportion of *P. knowlesi* infections were in children compared to those with *P. vivax* or *P. falciparum*. The lower incidence of clinical disease from *P. knowlesi* infection in infants and also older children has been attributed to epidemiological factors such as lower forest exposure [1, 13, 18], although contributing age-related innate protective mechanisms are plausible [33], and asymptomatic infection has been reported in children [34]. Most children with knowlesi malaria had anemia at enrollment, consistent with a previous retrospective report [22]. Although adults with knowlesi malaria had higher parasite counts, nonsevere anemia was more common in children, suggesting that children may have a higher rate of uninfected RBC destruction and/or greater dyserythropoiesis, although underlying mechanisms and baseline community anemia prevalence require further investigation [35]. Children with knowlesi malaria had lower parasitemia and platelet counts compared to children with either *P. vivax* or *P. falciparum* infection, in addition to a lower neutrophil count compared to *P. vivax*. However, there was a comparable risk of nonsevere anemia and AKI seen in *P. knowlesi*-infected children as in those with *P. vivax* or *P. falciparum*.

The proportion of adults with severe disease from *P. knowlesi* infection was comparable to that seen in *P. falciparum*. The risk of severe knowlesi malaria in this primary referral setting in Sabah, 6.2% in adults, was similar to district hospital presentations in Sarawak (9.3%) [17], and lower than that demonstrated in a tertiary hospital setting of 29% [18]. Severe AKI was the most frequent severity criterion, and has commonly been reported in other adult studies [17, 18, 32]. Severe anemia was present in a larger proportion of adults with severe knowlesi malaria than in a previous tertiary-referral study, which reported anemia as a severe criterion in only 5% of adults, 1 of whom was splenectomized [18]. *Plasmodium knowlesi* parasitemia [18, 32] and age [33] independently predicted severe disease in this study, in addition to abdominal pain and dyspnea, which have not been previously demonstrated. Parasite counts were higher in severe knowlesi malaria than in uncomplicated disease despite no difference in the number of preceding days of fever, which suggests differences in efficacy and tropism of normocyte invasion and parasite multiplication [31]. With age an independent risk factor for both parasitemia and severity, the immunosenescence that occurs with aging [33, 36] may also result in impaired control of parasite multiplication.

The pathophysiological mechanisms in severe knowlesi malaria are not well understood but likely differ from *P. falciparum*, with coma remaining unreported and a lack of the retinal microcirculatory changes found in severe falciparum malaria [37]. With endothelial activation and systemic inflammation at

least as high in response to *P. knowlesi* as in *P. falciparum* infection [33, 36], these processes also likely contribute to pathogenesis, particularly with the comparatively low parasite biomass able to produce severe disease observed in this study. The nature and role of microvascular accumulation of parasitized RBCs, a key mechanism of severe knowlesi malaria in rhesus macaques and also observed in a single human autopsy report [21], requires investigation. RBC deformability is reduced in proportion to disease severity in knowlesi malaria [38], however the role of hemolysis and endothelial dysfunction, other key pathogenic mechanisms also present in severe falciparum malaria [39], require further investigation. Phenotypic glucose-6-phosphate dehydrogenase deficiency has been shown to protect against knowlesi malaria [13]. Other host genetic factors related to selection pressure from historical human-only *Plasmodium* transmission may also modulate disease severity.

Current knowlesi malaria management guidelines in Sabah recommend referral for tertiary care and initial treatment with intravenous artesunate for any patients >50 years of age or with a parasitemia >20 000/μL [18, 40]. Along with appropriate intravenous artesunate administration for severe malaria due to any *Plasmodium* species, these management guidelines have contributed to a decline in reported malaria case-fatality rate [6, 18, 20]. In the current study, predictors were limited to severe disease given the low case-fatality rate, with a parasite threshold of 15 000 parasites/μL giving a high negative predictive value of 98.5%. A conservative approach would be to recommend early administration of intravenous artesunate initially for any knowlesi malaria case with a parasite count above this threshold, given the potential delay or inability to evaluate other laboratory markers of severe disease in most primary care settings. In conclusion, although the majority of cases are uncomplicated, *P. knowlesi* infection causes morbidity at comparatively low parasitemia in both adults and children. Adults are at risk of severe and fatal disease, in contrast to children, among whom this was not demonstrated. A conservative treatment approach utilizing parasite counts to predict severe disease is warranted.

### Supplementary Data

Supplementary materials are available at *Clinical Infectious Diseases* online. Consisting of data provided by the authors to benefit the reader, the posted materials are not copyedited and are the sole responsibility of the authors, so questions or comments should be addressed to the corresponding author.

### Notes

**Author contributions.** N. M. A., T. W. Y., T. W., B. E. B., and M. J. G. conceived and designed the study; M. J. G., E. S., C. S. W., K. P., and A. C. conducted the study with assistance from G. S. R., T. W. Y., T. W., J. M., B. E. B., C. J. D., and N. M. A.; K. P. coordinated the laboratory work; M. J. G. conducted the data analysis, with assistance from N. M. A., T. W. Y., and B. E. B.; M. J. G. wrote the first draft of the manuscript. All authors reviewed the final manuscript.

**Acknowledgments.** We thank the study participants; the malaria research team nursing and laboratory staff; and Malaysian Ministry of Health hospital directors and clinical staff at Kudat, Kota Marudu, and Pitas

District Hospitals. We also recognize the support from Dr Goh Pik Pin and the Clinical Research Centre, Queen Elizabeth Hospital, Kota Kinabalu, Sabah; colleagues and staff of the UK Medical Research Council *P. knowlesi* Monkeybar Project; and the Director-General of Health, Ministry of Health, Malaysian government. We thank Amar Aziz (Menzies School of Health Research) for conducting the polymerase chain reaction assays.

**Financial support.** This study was funded by the Malaysian Ministry of Health (grant number BP00500420); Asia Pacific Malaria Elimination Network (grant number 108-07); Australian National Health and Medical Research Council (grant numbers 1037304 and 1045156; fellowships [numbers 1042072 to N. M. A., 605831 to T. W. Y., 1088738 to B. E. B., and 1138860 to M. J. G.]; "Improving Health Outcomes in the Tropical North: a multidisciplinary collaboration 'Hot North'" (grant number 1131932; fellowship to M. J. G.); the UK Medical Research Council, Natural Environment Research Council, Economic and Social Research Council, and Biotechnology and Biosciences Research Council (Environmental and Social Ecology of Human Infectious Diseases Initiative; grant number G1100796); and the National Institutes of Health (USA) grant number R01AI116472-01. T. W. Y. is funded by a Singapore National Medical Research Council Clinician Scientist Award (CSA INV 15nov007).

**Potential conflicts of interest.** All authors: No reported conflicts of interest. All authors have submitted the ICMJE Form for Disclosure of Potential Conflicts of Interest. Conflicts that the editors consider relevant to the content of the manuscript have been disclosed.

## References

- Singh B, Kim Sung L, Matusop A, et al. A large focus of naturally acquired *Plasmodium knowlesi* infections in human beings. *Lancet* **2004**; 363:1017–24.
- Singh B, Daneshvar C. Human infections and detection of *Plasmodium knowlesi*. *Clin Microbiol Rev* **2013**; 26:165–84.
- Shearer FM, Huang Z, Weiss DJ, et al. Estimating geographical variation in the risk of zoonotic *Plasmodium knowlesi* infection in countries eliminating malaria. *PLoS Negl Trop Dis* **2016**; 10:e0004915.
- World Health Organization. World malaria report 2017. Available at: <http://www.who.int/malaria/publications/world-malaria-report-2017/report/en/>. Accessed 28 December 2017.
- World Health Organization Malaria Policy Advisory Committee. Outcomes from the Evidence Review Group on *Plasmodium knowlesi*. **2017**. Available at: <http://www.who.int/malaria/mpac/mpac-mar2017-plasmodium-knowlesi-presentation.pdf>. Accessed 15 December 2017.
- Rajahram GS, Barber BE, William T, et al. Falling *Plasmodium knowlesi* malaria death rate among adults despite rising incidence, Sabah, Malaysia, 2010–2014. *Emerg Infect Dis* **2016**; 22:41–8.
- William T, Jelip J, Menon J, et al. Changing epidemiology of malaria in Sabah, Malaysia: increasing incidence of *Plasmodium knowlesi*. *Malar J* **2014**; 13:390.
- Yusof R, Lau Y-L, Mahmud R, et al. High proportion of knowlesi malaria in recent malaria cases in Malaysia. *Malar J* **2014**; 13:1–9.
- Lubis IND, Wijaya H, Lubis M, et al. Contribution of *Plasmodium knowlesi* to multispecies human malaria infections in North Sumatera, Indonesia. *J Infect Dis* **2017**; 215:1148–55.
- Herdiana H, Cotter C, Coutrier FN, et al. Malaria risk factor assessment using active and passive surveillance data from Aceh Besar, Indonesia, a low endemic, malaria elimination setting with *Plasmodium knowlesi*, *Plasmodium vivax*, and *Plasmodium falciparum*. *Malar J* **2016**; 15:468.
- Barber BE, William T, Grigg MJ, Yeo TW, Anstey NM. Limitations of microscopy to differentiate *Plasmodium* species in a region co-endemic for *Plasmodium falciparum*, *Plasmodium vivax* and *Plasmodium knowlesi*. *Malar J* **2013**; 12:8.
- Cox-Singh J, Davis TM, Lee KS, et al. *Plasmodium knowlesi* malaria in humans is widely distributed and potentially life threatening. *Clin Infect Dis* **2008**; 46:165–71.
- Grigg MJ, Cox J, William T, et al. Individual-level factors associated with the risk of acquiring human *Plasmodium knowlesi* malaria in Malaysia: a case-control study. *Lancet Planet Health* **2017**; 1:e97–e104.
- Wong ML, Chua TH, Leong CS, et al. Seasonal and spatial dynamics of the primary vector of *Plasmodium knowlesi* within a major transmission focus in Sabah, Malaysia. *PLoS Negl Trop Dis* **2015**; 9:e0004135.
- Imai N, White MT, Ghani AC, Drakeley CJ. Transmission and control of *Plasmodium knowlesi*: a mathematical modelling study. *PLoS Negl Trop Dis* **2014**; 8:e2978.
- Brock PM, Fornace KM, Parmiter M, et al. *Plasmodium knowlesi* transmission: integrating quantitative approaches from epidemiology and ecology to understand malaria as a zoonosis. *Parasitology* **2016**; 143:389–400.
- Daneshvar C, Davis TM, Cox-Singh J, et al. Clinical and laboratory features of human *Plasmodium knowlesi* infection. *Clin Infect Dis* **2009**; 49:852–60.
- Barber BE, William T, Grigg MJ, et al. A prospective comparative study of knowlesi, falciparum, and vivax malaria in Sabah, Malaysia: high proportion with severe disease from *Plasmodium knowlesi* and *Plasmodium vivax* but no mortality with early referral and artesunate therapy. *Clin Infect Dis* **2013**; 56:383–97.
- William T, Menon J, Rajahram G, et al. Severe *Plasmodium knowlesi* malaria in a tertiary care hospital, Sabah, Malaysia. *Emerg Infect Dis* **2011**; 17:1248–55.
- Rajahram GS, Barber BE, William T, Menon J, Anstey NM, Yeo TW. Deaths due to *Plasmodium knowlesi* malaria in Sabah, Malaysia: association with reporting as *Plasmodium malariae* and delayed parenteral artesunate. *Malar J* **2012**; 11:284.
- Cox-Singh J, Hiu J, Lucas SB, et al. Severe malaria—a case of fatal *Plasmodium knowlesi* infection with post-mortem findings: a case report. *Malar J* **2010**; 9:10.
- Barber BE, William T, Jikal M, et al. *Plasmodium knowlesi* malaria in children. *Emerg Infect Dis* **2011**; 17:814–20.
- Grigg MJ, William T, Menon J, et al. Artesunate-mefloquine versus chloroquine for treatment of uncomplicated *Plasmodium knowlesi* malaria in Malaysia (ACT KNOW): an open-label, randomised controlled trial. *Lancet Infect Dis* **2016**; 16:180–8.
- Grigg MJ, William T, Menon J, et al. Efficacy of artesunate-mefloquine for chloroquine-resistant *Plasmodium vivax* malaria in Malaysia: an open-label, randomized, controlled trial. *Clin Infect Dis* **2016**; 62:1403–11.
- Grigg MJ, William T, Barber BE, et al. Artemether-lumefantrine versus chloroquine for the treatment of uncomplicated *Plasmodium knowlesi* malaria (CAN KNOW): an open-label randomized controlled trial. *Clin Infect Dis* **2018**; 66:229–36.
- World Health Organization. Severe malaria. *Trop Med Int Health* **2014**; 19(Suppl 1):7–131.
- World Health Organization. Haemoglobin concentrations for the diagnosis of anaemia and assessment of severity. **2011**. Available at: <http://www.who.int/vmnis/indicators/haemoglobin.pdf>. Accessed 9 June 2015.
- Kidney Disease Outcomes Quality Working Group. KDIGO clinical practice guidelines for acute kidney injury. *Kidney Int Suppl* **2012**; 2:1–138.
- Imwong M, Tanomsing N, Pukrittayakamee S, Day NP, White NJ, Snounou G. Spurious amplification of a *Plasmodium vivax* small-subunit RNA gene by use of primers currently used to detect *P. knowlesi*. *J Clin Microbiol* **2009**; 47:4173–5.
- Padley D, Moody AH, Chiodini PL, Saldanha J. Use of a rapid, single-round, multiplex PCR to detect malarial parasites and identify the species present. *Ann Trop Med Parasitol* **2003**; 97:131–7.
- Moon RW, Sharaf H, Hastings CH, et al. Normocyte-binding protein required for human erythrocyte invasion by the zoonotic malaria parasite *Plasmodium knowlesi*. *Proc Natl Acad Sci U S A* **2016**; 113:7231–6.
- Willmann M, Ahmed A, Siner A, et al. Laboratory markers of disease severity in *Plasmodium knowlesi* infection: a case control study. *Malar J* **2012**; 11:363.
- Barber BE, Grigg MJ, William T, et al. Effects of aging on parasite biomass, inflammation, endothelial activation, microvascular dysfunction and disease severity in *Plasmodium knowlesi* and *Plasmodium falciparum* malaria. *J Infect Dis* **2017**; 215:1908–17.
- Fornace KM, Nuin NA, Betson M, et al. Asymptomatic and submicroscopic carriage of *Plasmodium knowlesi* malaria in household and community members of clinical cases in Sabah, Malaysia. *J Infect Dis* **2016**; 213:784–7.
- Douglas NM, Anstey NM, Buffet PA, et al. The anaemia of *Plasmodium vivax* malaria. *Malar J* **2012**; 11:135.
- Cox-Singh J, Singh B, Daneshvar C, Planche T, Parker-Williams J, Krishna S. Anti-inflammatory cytokines predominate in acute human *Plasmodium knowlesi* infections. *PLoS One* **2011**; 6:e20541.
- Govindasamy G, Barber BE, Ghani SA, et al. Retinal changes in uncomplicated and severe *Plasmodium knowlesi* malaria. *J Infect Dis* **2016**; 213:1476–82.
- Barber BE, Russell B, Grigg MJ, Zhang Rou, William T, Amir A, Lau YL, Chatfield MD, Dondorp A, Anstey NM, Yeo TW. Reduced red blood cell deformability in *Plasmodium knowlesi* malaria. *Blood Advances*. [2018]; in press.
- Yeo TW, Lampah DA, Tjitra E, et al. Greater endothelial activation, Weibel-Palade body release and host inflammatory response to *Plasmodium vivax*, compared with *Plasmodium falciparum*: a prospective study in Papua, Indonesia. *J Infect Dis* **2010**; 202:109–12.
- Barber BE, Grigg MJ, William T, Yeo TW, Anstey NM. The treatment of *Plasmodium knowlesi* malaria. *Trends Parasitol* **2017**; 33:242–53.
